# Supplementary material for: C–F-rich oil drop as a non-expendable fluid interface modifier with low surface energy to stabilize a Li metal anode
Source: Royal Society of Chemistry journal article supplement (doi:10.1039/d0ee03952g), 2021-01-01
Supplement: d0ee03952g1.pdf [file d0ee03952g1.pdf]

## Supporting information

### C-F-rich oil drop as non-expendable fluid interface modifier with low surface energy to stabilize Li metal anode

Qifan Yang<sup>a,b,c</sup>, Jiulin Hu<sup>a,c</sup>, Junwei Meng<sup>a,b,c</sup>, Chilin Li<sup>a,b,c,\*</sup>

<sup>a</sup> State Key Laboratory of High Performance Ceramics and Superfine Microstructure, Shanghai Institute of Ceramics, Chinese Academy of Sciences, 585 He Shuo Road, Shanghai 201899, China. Email: [chilinli@mail.sic.ac.cn](mailto:chilinli@mail.sic.ac.cn)

<sup>b</sup> Center of Materials Science and Optoelectronics Engineering, University of Chinese Academy of Sciences, Beijing 100049, China.

<sup>c</sup> CAS Key Laboratory of Materials for Energy Conversion, Shanghai Institute of Ceramics, Chinese Academy of Sciences, Shanghai 201899, China

### Experimental Section

**Material Preparation.** Perfluoropolyether (PFPE), i.e. polyperfluoromethyl isopropyl ether  $\text{CF}_3\text{O}[-\text{CF}(\text{CF}_3)\text{CF}_2\text{O}-]_x(-\text{CF}_2\text{O}-)_y\text{CF}_3$ , purchased from Aladdin corp.) was used. A drop of PFPE was transferred onto the surface of polished Li metal by a pipette under Ar atmosphere in the glove box. After the surface is well wetted and covered by PFPE, the modified anode was prepared for the following cell assembling.

**Electrochemical Measurement.** Electrochemical experiments were carried out by using coin cells in a LAND-CT2001A battery system. CR2032 type coin cells of two-electrode configuration were used to perform the galvanostatic measurement. Symmetric Li/Li and asymmetric Cu/Li cells were assembled to test the Li plating and stripping performance at different current densities. Li/Li cells were tested in the carbonate-based electrolyte with 1M  $\text{LiPF}_6$  in ethylene carbonate (EC) and dimethyl carbonate (DMC) (1:1 in volume). Cu/Li cells were characterized in the ether-based electrolyte with 1M bistrifluoromethanesulfonimide lithium salt ( $\text{LiTFSI}$ ) and 0.2M

LiNO<sub>3</sub> additive in dimethyl ether (DME) and 1,3-dioxolane (DOL) (1:1 in volume), as well as in the above-mentioned carbonate system. LiNi<sub>0.8</sub>Mn<sub>0.1</sub>Co<sub>0.1</sub>O<sub>2</sub> (NMC811)/Li, LiFePO<sub>4</sub>/Li and LiNi<sub>0.8</sub>Co<sub>0.15</sub>Al<sub>0.05</sub>O<sub>2</sub>(NCA)/Li full cells based on the carbonate-based electrolyte were cycled in a voltage range of 3-4.5 V, 3-4.3 V and 2.0-3.8 V at different rates respectively. Glass fiber (GF/B, Whatman) was applied as a separator. The electrolyte amount is 120 μL. The electrochemical impedance spectra (EIS) were done by using a Solartron frequency analyzer (1260–1296) in a frequency range of 10<sup>-2</sup>–10<sup>6</sup> Hz. The Cu/Li cells used for EIS measurement was priorly cycled at 1 mA cm<sup>-2</sup> with a capacity of 2 mAh cm<sup>-2</sup> in ether electrolyte. The exchange current density (I<sub>0</sub>) was estimated based on the linear sweep voltammetry (LSV, VersaSTAT3, AMETEK Scientific Instruments) for Li/Li cells at a scanning rate of 0.1 mV s<sup>-1</sup> in a voltage window of -0.2–0.2 V. The cation transference number (t<sub>+</sub>) was estimated based on Potentiostatic Polarization method by comparing the EIS of Li/Li cells before and after polarization via Solartron frequency analyzer (1260–1296). The direct current polarization measurement in this method was performed on an electrochemical workstation (VersaSTAT3, AMETEK Scientific Instruments) with a voltage bias of 5 mV to obtain the initial and steady-state currents.

**Material Characterization.** For the scanning electron microscopy (SEM) observation of cycled electrode surface morphology, the cycled Li/Li and Cu/Li cells cycled at plating state were disassembled in an argon-filled glovebox. The cycled electrodes were washed by DMC or DME to remove the residual electrolyte salt. After dried, they were sealed in an argon-filled container and then quickly transferred into the SEM equipment (Magellan 400L, FEI) for observation. X-ray photoelectron spectroscopy (XPS, ESCA Lab-250) analysis was performed to characterize the surface components of the pristine and cycled Li electrodes. The cycled Li electrodes were disassembled from the Li/Li cells after 5 cycles at plating state in carbonate electrolyte. The contact angle test for oil drop on Cu surface was carried on contact angle measuring instrument SDC200.

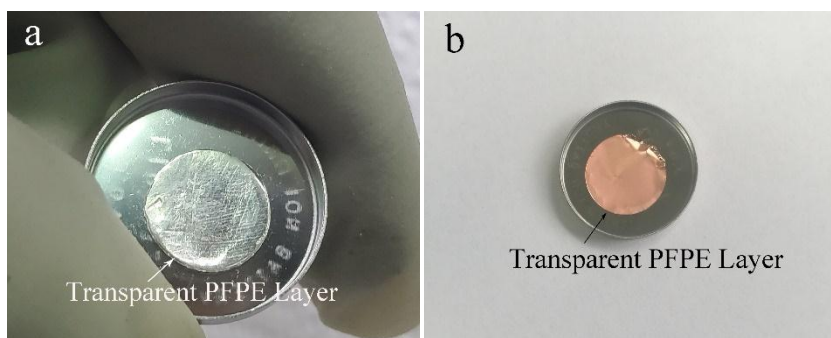

**Figure S1.** Digital photos of transparent PFPE oil layer spread on (a) Li anode surface and (b) Cu electrode surface.

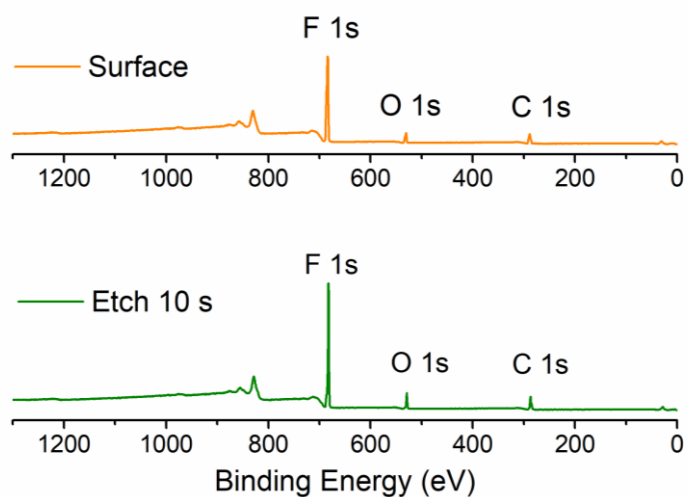

**Figure S2.** Survey XPS spectra of PFPE modified Li surface at pristine state in full binding energy range.

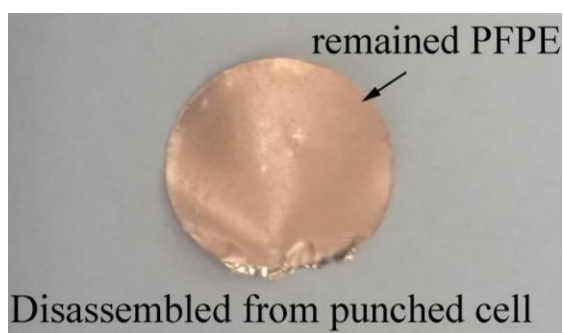

**Figure S3.** Digital photo of residual PFPE oil on Cu electrode from disassembled coin type cell.

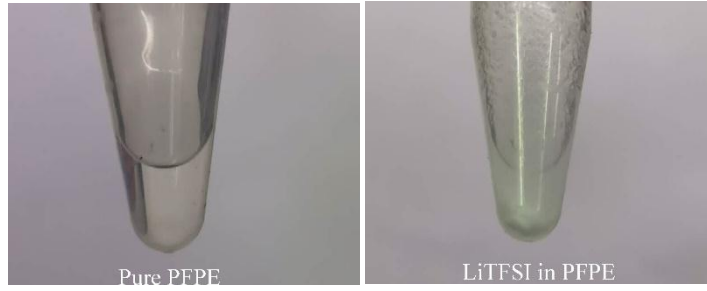

**Figure S4.** Digital photos of Li salt solubility test in PFPE (LiTFSI: 0.1mg, PFPE: 120  $\mu$ L).

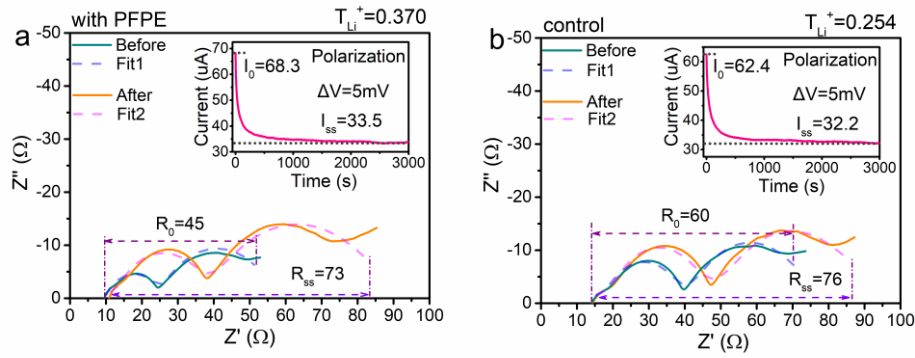

**Figure S5.** EIS of Li/Li cells before and after polarization for the estimation of  $\text{Li}^+$  transference number: (a) under the effect of PFPE modification and (b) the control case at plated state after 40 cycles at  $1 \text{ mA cm}^{-2}$  ( $2 \text{ mAh cm}^{-2}$ ) in  $\text{LiPF}_6\text{-EC-DMC}$  systems. Insets: corresponding direct current polarization curves.

For this Potentiostatic Polarization method, under a small potential polarization ( $\leq 10 \text{ mV}$ ), the transference number for cation ( $t_+$ ) is given by

$$t_+ = \frac{I_{SS}(\Delta V - I_0 R_0)}{I_0(\Delta V - I_{SS} R_{SS})} \quad (1)$$

where  $I_0$  is the initial current,  $I_{SS}$  is the steady-state current,  $\Delta V$  is the applied voltage bias,  $R_0$  and  $R_{SS}$  are the interface resistances of cells before and after the polarization, respectively.

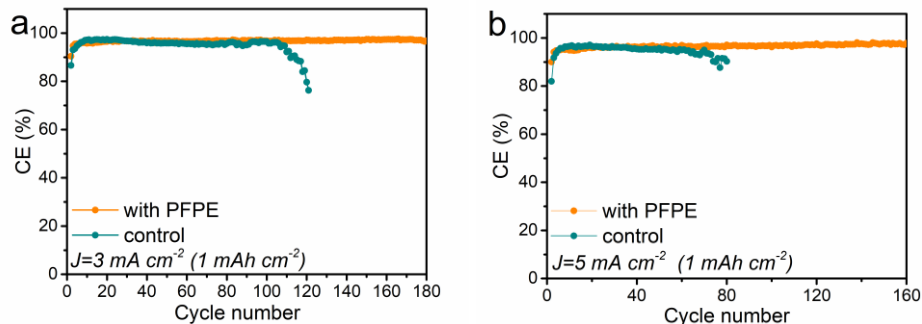

**Figure S6.** Cycling performance and CE evolution of Cu/Li asymmetric cells with and without PFPE modification at the current densities of (a)  $3 \text{ mA cm}^{-2}$  ( $1 \text{ mAh cm}^{-2}$ ) and (b)  $5 \text{ mA cm}^{-2}$  ( $1 \text{ mAh cm}^{-2}$ ).

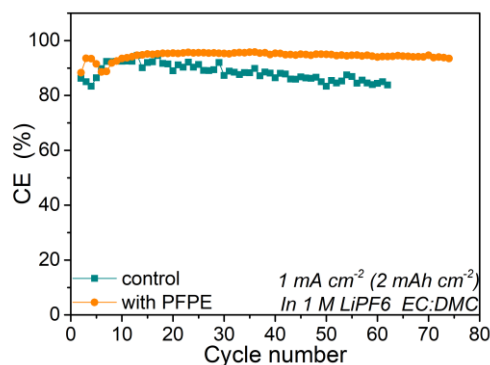

**Figure S7.** Cycling performance and CE evolution of Cu/Li asymmetric cells with and without PFPE modification at the current density of  $1 \text{ mA cm}^{-2}$  ( $2 \text{ mAh cm}^{-2}$ ) in carbonate electrolyte system.

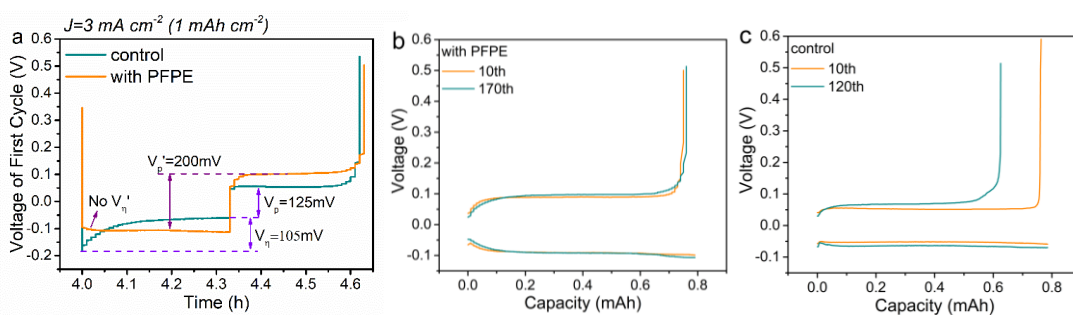

**Figure S8.** (a) Voltage-time profiles of Cu/Li cells with and without PFPE modification during the first cycle at  $3 \text{ mA cm}^{-2}$ . (b) Corresponding voltage-capacity

profiles for the cases (b) with and (c) without PFPE.  $V_{\eta}'$  and  $V_{\eta}$  are the nuclei overpotentials for the cases with and without PFPE respectively.  $V_p'$  and  $V_p$  are the plateau overpotentials for the cases with and without PFPE respectively.

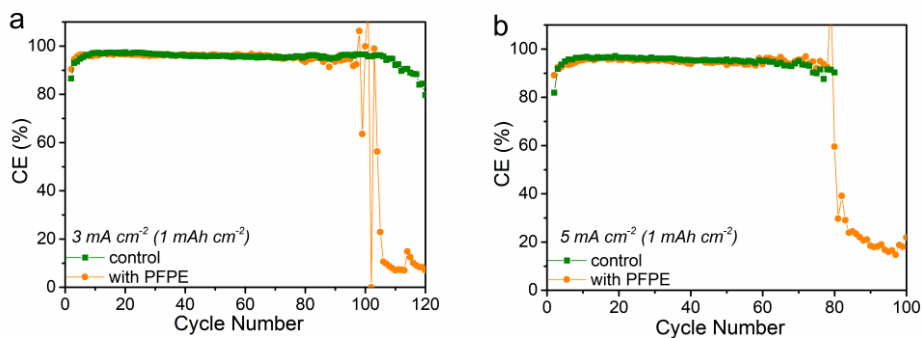

**Figure S9.** Cycling performance and CE evolution of Cu/Li asymmetric cells after increasing the drop amount of PFPE to four drops at the current densities of (a)  $3 \text{ mA cm}^{-2}$  and (b)  $5 \text{ mA cm}^{-2}$  with a capacity of  $1 \text{ mAh cm}^{-2}$ .

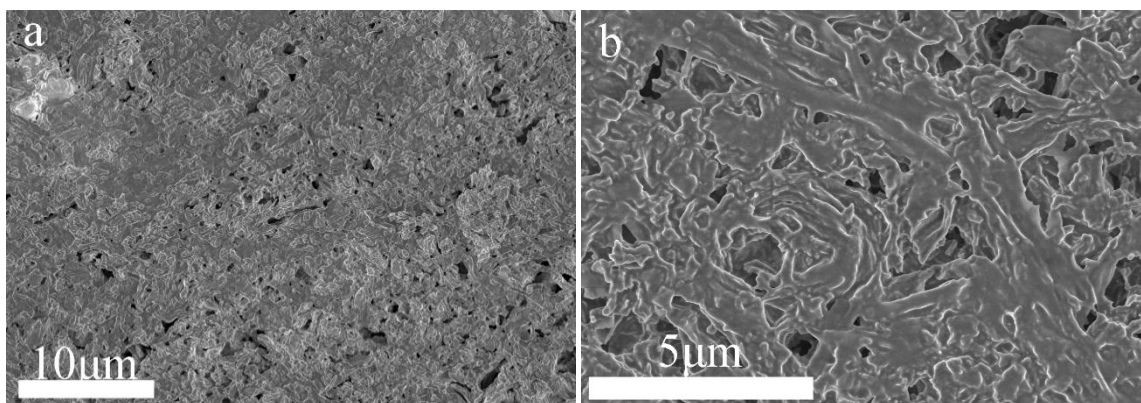

**Figure S10.** (a) Overview and (b) magnified SEM images of deposited Li on PFPE coated Cu electrode after 40 cycles.

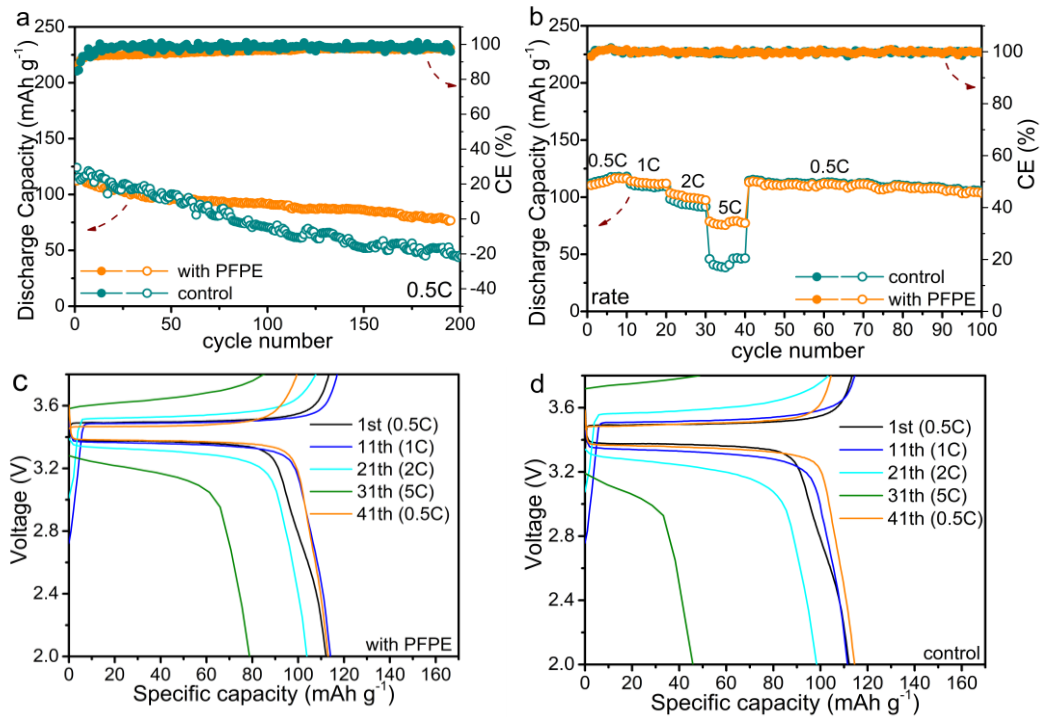

**Figure S11.** (a) Cycling performance of LiFePO<sub>4</sub>/Li cells with and without PFPE modification at 0.5 C. (b) Rate performance of LiFePO<sub>4</sub>/Li cells with and without PFPE modification. Corresponding voltage-capacity profiles of (c) modified and (d) control full cells at different rates.

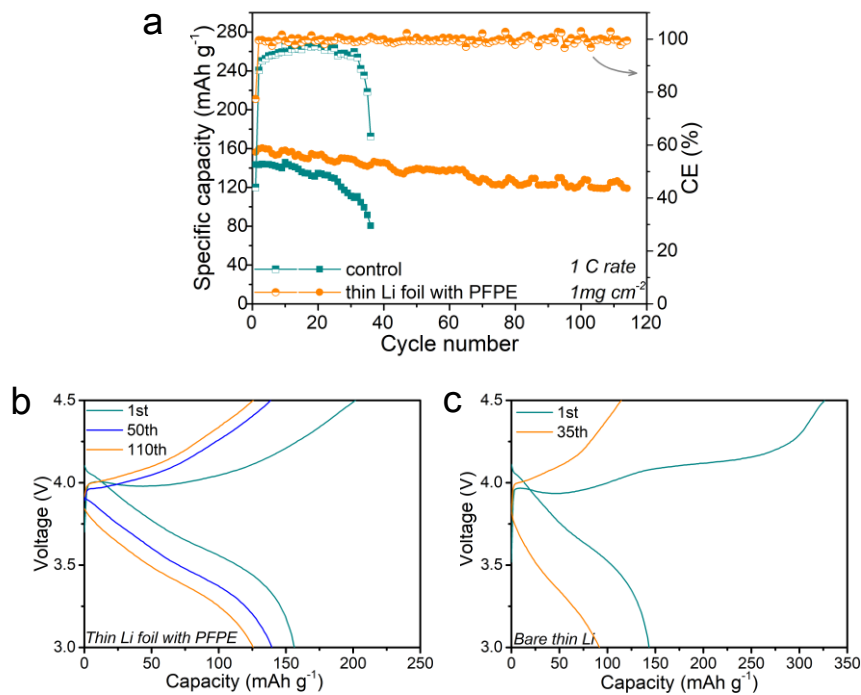

**Figure S12.** (a) Cycling performance of NCM811/thin Li full cells with and without PFPE modification at 1 C. Corresponding voltage-capacity profiles of (b) modified and (c) control full cells at different cycling stages.

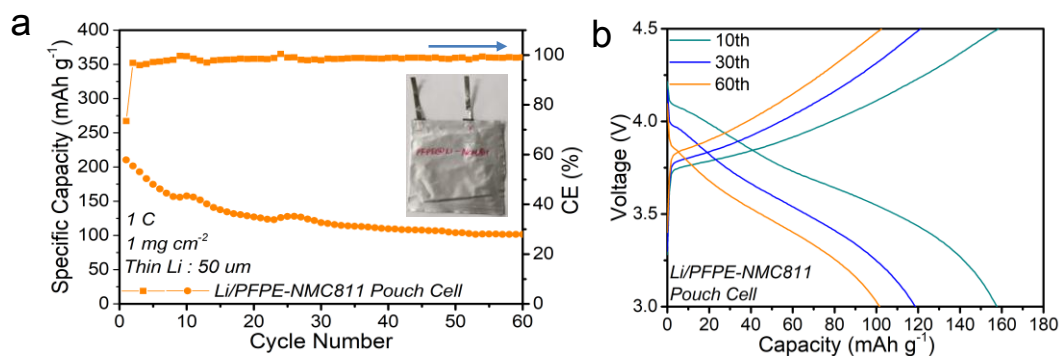

**Figure S13.** (a) Cycling performance of NCM811/thin Li pouch cell with PFPE modification at 1 C. (b) Corresponding voltage-capacity profiles of pouch full cell at different cycling stages.

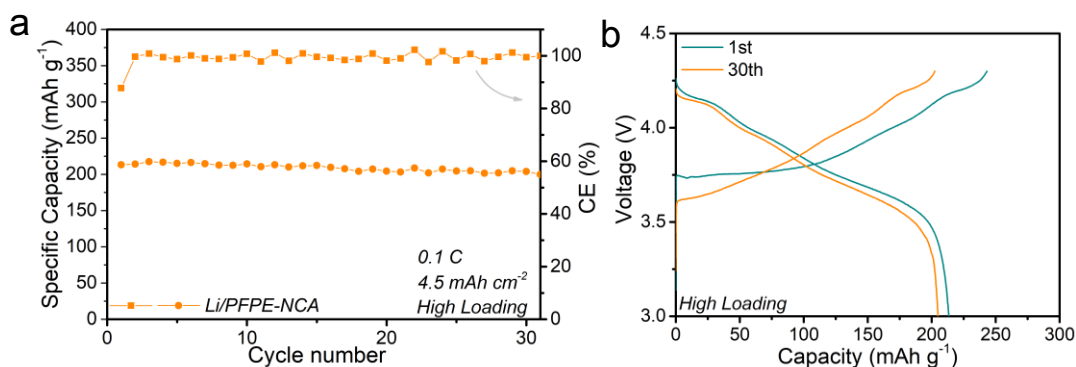

**Figure S14.** (a) Cycling performance of PFPE modified NCA/Li full cell with an area capacity of cathode as high as 4.5 mAh cm<sup>-2</sup> at 0.1 C. (b) Corresponding voltage-capacity profiles of high-loading full cell at different cycling stages.
